# Supplementary material for: Porous organic polymers (POPs) for environmental remediation
Source: Royal Society of Chemistry journal article supplement (doi:10.1039/d3mh00672g), 2023-01-01
Supplement: d3mh00672g1.pdf [file d3mh00672g1.pdf]

# Supporting Information

## Porous Organic Polymers (POPs) for Environmental Remediation

Sahel Fajal,<sup>a†</sup> Subhajit Dutta,<sup>a†</sup> and Sujit K. Ghosh<sup>\*a,b</sup>

<sup>a</sup>Department of Chemistry, Indian Institute of Science Education and Research, Dr. Homi Bhabha Road, Pashan, Pune 411008, India.

<sup>b</sup>Centre for Water Research, Indian Institute of Science Education and Research, Dr. Homi Bhabha Road, Pashan, Pune 411008, India.

E-mail: sghosh@iiserpune.ac.in

Tel: +91 20 2590 8076

<sup>†</sup>These authors contributed equally.

**Table S1:** Table of POPs-based materials for sensing of explosives.

| POPs                                   | Explosives | $K_{sv}$ ( $M^{-1}$ )                  | LOD          | Mechanism                            | References |
|----------------------------------------|------------|----------------------------------------|--------------|--------------------------------------|------------|
| PNT-4                                  | TNP        | 621901                                 | 2.36 nM      | Absorption competition               | 1          |
| PNT-5                                  |            | 507800                                 | 3.12 nM      |                                      |            |
| PNT-6                                  |            | 238278                                 | 5.52 nM      |                                      |            |
| COP-3                                  | TNP        | 14533                                  | <1 ppm       | Static quenching & electron transfer | 2          |
| COP-4                                  |            | 3926                                   | <1 ppm       |                                      |            |
| COP-401                                | TNP        | $8.3 \times 10^4$                      | <1 ppm       | Electron transfer                    | 3          |
| COP-301                                |            | $2.6 \times 10^5$                      | <1 ppm       |                                      |            |
| Py-azo-COP                             | TNP        | $1.37 \times 10^3$                     | --           | Static quenching                     | 4          |
| CMP-LS1                                | TNP        | $5.05 \times 10^4$                     | --           | Electron transfer; energy transfer   | 5          |
| CMP-LS2                                |            | $3.70 \times 10^4$                     | --           |                                      |            |
| PP <sub>C</sub> -PPy <sub>S</sub> -PAF | TNT        | $2.21 \times 10^{-2} \text{ ppm}^{-1}$ | --           | Electron transfer                    | 6          |
|                                        | TNP        | $2.42 \times 10^{-2} \text{ ppm}^{-1}$ | --           |                                      |            |
| TRIPTA                                 | TNP        | $2.7 \times 10^6$                      | <51.96 nM    | Static quenching                     | 7          |
|                                        | DNP        | $2.13 \times 10^6$                     | --           | Dynamic quenching                    |            |
|                                        | 2,4-DNT    | $1.19 \times 10^6$                     | --           | Dynamic quenching                    |            |
| COP-61                                 | TNP        | $2.40 \times 10^5$                     | <1 ppm       | Electron transfer                    | 8          |
| COP-612                                | TNP        | $2.51 \times 10^5$                     | --           | Static quenching                     | 9          |
| iPrTAPB-Azo-COP                        | TNP        | $1.1 \times 10^4$                      | --           | Static quenching                     | 10         |
| PTPETCz                                | TNT        | --                                     | 10 ppb       | Electron transfer                    | 11         |
| PTPETPOcCz                             | TNT        | --                                     | 1 ppm        | Energy transfer                      | 12         |
| PHCPN                                  | TNT        | $1.38 \times 10^3$                     | 10 $\mu$ M   | --                                   | 13         |
| LPCMP2                                 | TNT        | 4147                                   | 3.64 $\mu$ M | Electron transfer                    | 14         |
| FCMP3                                  | 2,4-DNT    | 5241                                   | --           | Charge transfer                      | 15         |
|                                        | NB         | 2541                                   | --           |                                      |            |
|                                        | NT         | 4708                                   | --           |                                      |            |
| TCB-CMP                                | 2,4-DNT    | $5.9 \times 10^3$                      | --           | Electron transfer                    | 16         |
| DTF                                    | TNP        | $2.08 \times 10^3$                     | 0.72 $\mu$ M | --                                   | 17         |
| TTPT                                   | o-NP       | $6.20 \times 10^3$                     | 2.18 nM      | Electron transfer                    | 18         |
| TPV                                    | RDX        | --                                     | ~2-3 ag      | Electron transfer                    | 19         |
| 3'PD                                   | TATP       | $3.03 \times 10^4$                     | --           | Oxidation                            | 20         |
|                                        | PA         | $1.0 \times 10^5$                      | --           | Charge transfer                      |            |

**Table S2:** Table of POPs-based materials for sensing of cations.

| POPs      | Metal ions       | $K_{sv}$ ( $M^{-1}$ ) | LOD           | Mechanism                            | References |
|-----------|------------------|-----------------------|---------------|--------------------------------------|------------|
| HPP-3     | Cu <sup>2+</sup> | 12785                 | --            | Electron transfer                    | 21         |
| HLPPs     | Cu <sup>2+</sup> | 400                   | --            | Electron transfer                    | 22         |
| LMOP-15   | Cu <sup>2+</sup> | $1.9 \times 10^5$     | 51 nM         | Chelation & charge transfer          | 23         |
| TSA-POPs  | Cu <sup>2+</sup> | --                    | --            | Charge transfer                      | 24         |
| Salen-COP | Cu <sup>2+</sup> | --                    | 0.140 $\mu$ M | Chelation & electron transfer        | 25         |
| COP-108-S | Hg <sup>2+</sup> | $4.87 \times 10^3$    | --            | Electron transfer & static quenching | 26         |

|                            |                               |                        |          |                               |    |
|----------------------------|-------------------------------|------------------------|----------|-------------------------------|----|
| TNPP                       | Hg <sup>2+</sup>              | 378450                 | 22.8 ppb | Chelation & electron transfer | 27 |
| NOP-28                     | Hg <sup>2+</sup>              | 3.7 x 10 <sup>4</sup>  | 12.0 ppb | Energy & electron transfer    | 28 |
| CTFQD                      | Hg <sup>2+</sup>              | --                     | 0.23 nM  | Coordination                  | 29 |
| Cz-TPM@I                   | Hg <sup>2+</sup>              | --                     | 4.9 μM   | Charge transfer               | 30 |
| PAF-5CF                    | Fe <sup>3+</sup>              | 11865                  | 38 μM    | Absorption competition        | 31 |
| DPA-CTF                    | Fe <sup>3+</sup>              | 1.35 x 10 <sup>4</sup> | 5.8 μM   | Absorption competition        | 32 |
| COP-100                    | Fe <sup>3+</sup>              | 2.97 x 10 <sup>4</sup> | 0.213 μM | Dynamic quenching             | 33 |
| COP-401-COOH               | Fe <sup>3+</sup>              | 84682                  | --       | Electron transfer             | 34 |
| COP-401-SO <sub>2</sub> Cl | Fe <sup>3+</sup>              | 46106                  | --       |                               |    |
| PNT-2                      | Fe <sup>3+</sup>              | 20186                  | 31 μM    | Absorption competition        | 35 |
| PNT-3                      | Fe <sup>3+</sup>              | 23982                  | 50.7 μM  |                               |    |
| TPA-COP                    | Fe <sup>3+</sup>              | --                     | 0.43 μM  | Chelation                     | 36 |
| HLPPs                      | Fe <sup>3+</sup>              | 8900                   | --       | Electron transfer             | 37 |
| POP-HT                     | Fe <sup>3+</sup>              | --                     | 5 ppm    | Lewis acid–base interaction   | 38 |
| CMPAO                      | UO <sub>2</sub> <sup>2+</sup> | --                     | 1.7 nM   | Energy transfer               | 39 |
| Salen-COP                  | Al <sup>3+</sup>              | --                     | 0.248 μM | Electron transfer             | 40 |
| Azo-Py                     | Al <sup>3+</sup>              | 152                    | --       | Electrostatic attraction      | 41 |
| COP-100                    | Fe <sup>2+</sup>              | 2.58 x 10 <sup>4</sup> | 0.245 μM | Dynamic quenching             | 42 |
| TPBCz-CMP                  | Co <sup>3+</sup>              | --                     | --       | Oxidation                     | 43 |
| TPBCz-CMP                  | Ag <sup>+</sup>               | --                     | --       |                               |    |

**Table S3:** Table for capacity of POPs-based adsorbents for uranium (UO<sub>2</sub><sup>2+</sup>) capture.

| POPs                                       | pH  | U Capacity | References |
|--------------------------------------------|-----|------------|------------|
| PAF-1-CH <sub>2</sub> AO                   | 6.0 | 300        | 44         |
| PAF-1-NH(CH <sub>2</sub> ) <sub>2</sub> AO | 6.0 | 385        | 45         |
| PAF-170-AO                                 | 6.0 | 702        | 46         |
| POP- <i>o</i> NH <sub>2</sub> -AO          | --  | 530        | 47         |
| COP-CN                                     | 4.5 | 214        | 48         |
| HCMPs                                      | --  | 450        | 49         |
| POP-AOF                                    | 7.0 | 584        | 50         |
| MA-U-PA                                    | 1.0 | 106.7      | 51         |
| HTC-MA-TMA                                 | 4.5 | 271.83     | 52         |
| ND-AO                                      | 4.5 | 212        | 53         |

**Table S4:** Table for capacity of POPs-based adsorbents for iodine (I<sub>2</sub>) vapor capture.

| POPs   | Temp. | I <sub>2</sub> Capacity (wt%) | References |
|--------|-------|-------------------------------|------------|
| HCP-V0 | 348 K | 324                           | 54         |
| HCP-V1 | 348 K | 426                           |            |
| HCP-V2 | 348 K | 525                           |            |
| THPS   | 348 K | 180                           | 55         |
| THSP-C | 348 K | 340                           |            |
| PAF-1  | 298 K | 186                           | 56         |
| JUC-ZZ | 298 K | 144                           |            |

|            |       |     |    |
|------------|-------|-----|----|
| PAF-24     | 348 K | 276 | 57 |
| P-DPDA     | 348 K | 408 |    |
| TBTT-CMP@1 | 350 K | 442 | 58 |
| TBTT-CMP@2 | 350 K | 357 |    |
| TBTT-CMP@3 | 350 K | 352 |    |
| TTPPA      | 350 K | 490 | 59 |
| TTDAB      | 350 K | 313 |    |
| TBIM       | 350 K | 943 | 60 |
| HBIM       | 350 K | 811 |    |
| TDP        | 350 K | 61  |    |
| TTPB       | 350 K | 443 | 61 |
| TS-TAD     | 350 K | 415 | 62 |
| CPP2       | 353 K | 200 | 63 |
| CPP-Tp     | 348 K | 346 | 64 |
| CPP-Pyr    | 348 K | 297 |    |
| CMP-LS5    | 353 K | 440 | 65 |
| SNCMP-1    | 350 K | 570 | 66 |
| SNCMP-2    | 350 K | 698 |    |
| CBP3       | 353 K | 135 | 67 |
| CBP5       | 353 K | 166 |    |

**Table S5:** Table for capacity of POPs-based adsorbents for perrhenate ( $\text{ReO}_4^-$ ) capture.

| POPs                         | Equilibrium times | $\text{ReO}_4^-$ Capacity (mg/g) | References |
|------------------------------|-------------------|----------------------------------|------------|
| TZ-PAF                       | 30 sec            | 982                              | 68         |
| SCU-CPN-1                    | 30 sec            | 999                              | 69         |
| SCU-CPN-2                    | 30 sec            | 1467                             | 70         |
| SCU-CPN-4                    | 1 min             | 437                              | 71         |
| ImPOP-1                      | 5 min             | 640                              | 72         |
| ImCOP                        | <2 min            | 1164                             | 73         |
| PPS                          | 150 min           | 596                              | 74         |
| CPN-tpm                      | 20 min            | 1133                             | 75         |
| VBCOP                        | --                | 444                              | 76         |
| $\text{IP}_{\text{POP-3}}$   |                   | 515.5                            | 77         |
| $\text{IP}_{\text{POP-4}}$   |                   | 350.3                            |            |
| $\text{IP}_{\text{POP-5}}$   |                   | 610                              | 78         |
| PQA-pN(Me) <sub>2</sub> Py-I | 5 min             | 997                              | 79         |
| PQA-Py-I                     | --                | 849                              |            |
| PQA-pNH <sub>2</sub> Py-I    | --                | 642                              |            |
| Compound-1                   | 60 min            | 517                              | 80         |

**Table S6:** Table of POP-based materials for carbon dioxide (CO<sub>2</sub>) gas capture.

| POPs                   | BET surface area (m <sup>2</sup> /g) | Temperature (K) | Pressure (bar) | CO <sub>2</sub> uptake (mmol/g) | Q <sub>st</sub> (kJ/mol) | Reference |
|------------------------|--------------------------------------|-----------------|----------------|---------------------------------|--------------------------|-----------|
| PPN-4                  | 6461                                 | 298             | 50             | 48.19                           | NM                       | 81        |
| BILP-2                 | 708                                  | 273             | 1              | 3.38                            | 28.6                     | 82        |
| BILP-4                 | 1135                                 | 273             | 1              | 5.34                            | 28.7                     |           |
| BILP-5                 | 599                                  | 273             | 1              | 2.9                             | 28.8                     |           |
| BILP-7                 | 1122                                 | 273             | 1              | 4.38                            | 27.8                     |           |
| ALP-1                  | 1235                                 | 273             | 1              | 5.37                            | 29.2                     |           |
| ALP-5                  | 801                                  | 273             | 1              | 4.46                            | 32.5                     | 84        |
| HCP-BDM                | 847                                  | 273             | 1              | 2.87                            | 33.5–25.4                | 85        |
| HCP-BA                 | 742                                  | 273             | 1              | 1.92                            | 27.4–24.1                |           |
| BILP-6-NH <sub>2</sub> | 1185                                 | 273             | 1              | 5.57                            | 29.5                     | 86        |
| p-PDM-DVB              | 841                                  | 273             | 1              | 1.25                            | NM                       | 87        |
| Fe-POP-1               | 875                                  | 273             | 1              | 4.30                            | NM                       | 88        |
| P-PCz                  | 1647                                 | 273             | 1              | 5.57                            | 30.9                     | 89        |
| PAF-60                 | 1094                                 | 273             | 1              | 2.53                            | ~34.2                    | 90        |
| PAF-61                 | 793                                  | 273             | 1              | 1.82                            | ~34.2                    |           |
| PAF-62                 | 701                                  | 273             | 1              | 1.69                            | ~34.2                    |           |
| MOPI-I                 | 206 <sup>a</sup>                     | 273             | 1              | 3.3                             | 39                       | 91        |
| MOPI-II                | 644 <sup>a</sup>                     | 273             | 1              | 2.9                             | 32                       |           |
| MOPI-III               | 443 <sup>a</sup>                     | 273             | 1              | 3.0                             | 32                       |           |
| MOPI-IV                | 660 <sup>a</sup>                     | 273             | 1              | 3.8                             | 31                       |           |
| MOPI-V                 | 921 <sup>a</sup>                     | 273             | 1              | 2.9                             | 13                       |           |
| PINK                   | 2090                                 | 273             | 1              | 4.11                            | 28.9                     | 92        |
| CTF-TPC                | 1668                                 | 273             | 1              | 2.17                            | 32                       | 93        |
| CTF-FL                 | 773                                  | 273             | 1              | 1.67                            | 35                       |           |
| TPB                    | 2435                                 | 273             | 1              | 5.9                             | NM                       | 94        |
| CTF-BI-4               | 1025                                 | 273             | 1              | 2.47                            | 31.7–34.3                | 95        |
| CTF-BI-11              | 1549                                 | 273             | 1              | 2.51                            | 31.7–34.3                |           |
| NAN-2                  | 56                                   | 273             | 1              | 1.49                            | 31.52                    | 96        |
| Ni-Por-1               | 1711                                 | 273             | 1.08           | 3.13                            | 24                       | 97        |
| TNP1                   | 1090                                 | 273             | 1              | 178                             | 37.0                     | 98        |
| TNP4                   | 1348                                 | 273             | 1              | 196                             | 36.5                     |           |
| FCDTPA-K-700           | 2065                                 | 273             | 1.13           | 6.51                            | < 30.55                  | 99        |
| Network-1              | 1980                                 | 273             | 1              | 3.63                            | 23.3                     | 100       |
| BILP-10                | 787                                  | 273             | 1              | 4.02                            | 38.2                     | 101       |
| BILP-11                | 658                                  | 273             | 1              | 3.09                            | 32.0                     |           |
| BILP-12                | 1497                                 | 273             | 1              | 5.29                            | 27.6                     |           |
| BILP-13                | 677                                  | 273             | 1              | 2.57                            | 26.7                     |           |
| PRP-1                  | 835                                  | 273             | 1              | 2.09                            | 25                       | 102       |
| HAT-CTF-450            | 756                                  | 273             | 1              | 2.8                             | NM                       | 103       |
| HAT-CTF-600            | 899                                  | 273             | 1              | 3.0                             | NM                       |           |
| HAT-CTF-450/600        | 1090                                 | 273             | 1              | 3.0                             | 27.1                     |           |
| PCN-AD                 | 843                                  | 273             | 1              | 1.49                            | NM                       | 104       |
| azo-COP-1              | 635.8                                | 273             | 1              | 2.44                            | 29.3                     | 105       |
| azo-COP-2              | 729.6                                | 273             | 1              | 2.55                            | 24.8                     |           |
| azo-COP-5              | 127.6                                | 273             | 1              | 2.04                            | 27.3                     |           |

|            |       |     |   |       |      |     |
|------------|-------|-----|---|-------|------|-----|
| azo-COP-6  | 679.1 | 273 | 1 | 2.22  | 25.8 | 106 |
| azo-COP-8  | 472.1 | 273 | 1 | 2.02  | 25.3 |     |
| azo-COP-9  | 509.6 | 273 | 1 | 2.05  | 25.3 |     |
| azo-COP-11 | 259.2 | 273 | 1 | 2.13  | 27.4 |     |
| H2tapp-A4  | 719   | 273 | 1 | 7.88  | 32.9 |     |
| Pd-tapp-A4 | 618   | 273 | 1 | 10.52 | 40.0 |     |
| Ni-tapp-A4 | 695   | 273 | 1 | 8.27  | 37.5 |     |
| Mn-tapp-A4 | 358   | 273 | 1 | 8.36  | 36.8 |     |
| Fe-tapp-A4 | 360   | 273 | 1 | 8.22  | 37.6 |     |
| Sn-tapp-A4 | 384   | 273 | 1 | 9.15  | 37.7 |     |
| HCP-91     | 1028  | 273 | 1 | 1.69  | 30.7 |     |
| HCP-94     | 672   | 273 | 1 | 1.48  | 32   |     |

<sup>a</sup> Calculated based on the BET equation with Ar/87.3 K

**Table S7:** Table for representative examples of POPs for cycloaddition of epoxides with CO<sub>2</sub>.

| POPs                                          | Active site                          | Substrate       | Reaction conditions  | Yield (%) | Reference |
|-----------------------------------------------|--------------------------------------|-----------------|----------------------|-----------|-----------|
| CTF-1                                         | Basic amine                          | Epichlorohydrin | 6.9 bar, 130 °C, 4 h | 77        | 108       |
| CTF-1-HSA                                     | Basic amine                          | Epichlorohydrin | 6.9 bar, 130 °C, 4 h | 96        |           |
| CTF-P-HSA                                     | Basic amine                          | Epichlorohydrin | 6.9 bar, 130 °C, 4 h | 95        |           |
| cCTF                                          | Dicationic viologen, Cl <sup>-</sup> | Epichlorohydrin | 10 bar, 90 °C, 12 h  | 95        | 109       |
| P(DVB-yEVIBr)                                 | Imidazolium and Br <sup>-</sup>      | Propylene oxide | 25 bar, 140 °C, 24 h | 92        | 110       |
| PDMBr                                         | Imidazolium and Br <sup>-</sup>      | Styrene oxide   | 10 bar, 110 °C, 4 h  | 97        | 111       |
| PAD-3                                         | OH <sup>-</sup> , amine              | Epichlorohydrin | 1 atm, 70 °C, 24 h   | 97        | 112       |
| DVB-HTA                                       | AOH, Br <sup>-</sup>                 | Epichlorohydrin | 12 bar, 120 °C, 3 h  | 88        | 113       |
| POMn-IM                                       | Imidazolium                          | Epichlorohydrin | 10 bar, 120 °C, 8 h  | 86        | 114       |
| PCP-Cl                                        | Cl <sup>-</sup>                      | Epichlorohydrin | 30 bar, 100 °C, 12 h | 98        | 115       |
| PPh <sub>3</sub> -ILBr-ZnX <sub>2</sub> @POPs | Zn <sup>2+</sup> , Br <sup>-</sup>   | Propylene oxide | 30 bar, 120 °C, 1 h  | 44        | 116       |
| Al-CPOP                                       | Al <sup>3+</sup> and Cl <sup>-</sup> | Epichlorohydrin | 1 atm, 120 °C, 24 h  | 94        | 117       |
| DVB@ISA                                       | Al <sup>3+</sup> and Br <sup>-</sup> | Epichlorohydrin | 10 bar, 60 °C, 24 h  | 99        | 118       |
| Co/POP-TPP                                    | Co <sup>3+</sup>                     | Epichlorohydrin | 1 atm, 29 °C, 24 h   | 95        | 119       |

|          |                  |                 |                       |    |     |
|----------|------------------|-----------------|-----------------------|----|-----|
| Al-HCP   | Al <sup>3+</sup> | Propylene oxide | 10 bar, 40 °C, 1 h    | 99 | 120 |
| Co-CMP   | Co <sup>3+</sup> | Propylene oxide | 1 atm, 25 °C, 48 h    | 82 | 121 |
| Co-MON   | Co <sup>3+</sup> | Propylene oxide | 10 bar, 60 °C, 12 h   | 75 | 122 |
| Bp-Zn@MA | Zn <sup>2+</sup> | Propylene oxide | 10 bar, 100 °C, 1.5 h | 99 | 123 |
| PRP-1    | AOH              | Epichlorohydrin | 1 bar, 60 °C, 24 h    | 89 | 124 |
| NP-NHC   | NHC              | Propylene oxide | 1 bar, 120 °C, 24 h   | 98 | 125 |

#### Reference:

1. M. Wang, H. Zhang, L. Guo and D. Cao, *Sens. Actuators, B*, 2018, 274, 102–109.
2. Z. Xiang and D. Cao, *Macromol. Rapid Commun.*, 2012, 33, 1184–1190.
3. N. Sang, C. Zhan and D. Cao, *J. Mater. Chem. A*, 2015, 3, 92–96.
4. S. K. Gupta, D. Kaleeswaran, S. Nandi, R. Vaidhyathan and R. Murugavel, *ACS Omega*, 2017, 2, 3572–3582.
5. S. Wang, Y. Liu, Y. Yu, J. Du, Y. Cui, X. Song and Z. Liang, *New J. Chem.*, 2018, 42, 9482–9487.
6. H. Ma, B. Li, L. Zhang, D. Han and G. Zhu, *J. Mater. Chem. A*, 2015, 3, 19346–19352.
7. R. Gomes and A. Bhaumik, *RSC Adv.*, 2016, 6, 28047–28054.
8. L. Guo and D. Cao, *J. Mater. Chem. C*, 2015, 3, 8490–8494.
9. L. Guo, D. Cao, J. Yun and X. Zeng, *Sens. Actuators, B*, 2017, 243, 753–760.
10. D. Kaleeswaran and R. Murugavel, *J. Chem. Sci.*, 2018, 130, 1.
11. V. S. Mothika, A. Raupke, K. O. Brinkmann, T. Riedl, G. Brunklaus and U. Scherf, *ACS Appl. Nano Mater.*, 2018, 1, 6483–6492.
12. A. Palma-Cando, D. Woitassek, G. Brunklaus and U. Scherf, *Mater. Chem. Front.*, 2017, 1, 1118–1124.
13. X. Wu, H. Li, B. Xu, H. Tong and L. Wang, *Polym. Chem.*, 2014, 5, 4521–4525.
14. L. Pan, Z. Liu, M. Tian, B. C. Schroeder, A. E. Aliev and C. F. J. Faul, *ACS Appl. Mater. Interfaces*, 2019, 11, 48352–48362.
15. Q. Zhang, S. Yu, Q. Wang, Q. Xiao, Y. Yue and S. Ren, *Macromol. Rapid Commun.*, 2017, 38, 1700445.
16. X. Liu, Y. Xu and D. Jiang, *J. Am. Chem. Soc.*, 2012, 134, 8738–8741.
17. T. M. Geng, S. N. Ye, Y. Wang, H. Zhu, X. Wang and X. Liu, *Talanta*, 2017, 165, 282–288.
18. T. Geng, W. Zhang, Z. Zhu, G. Chen, L. Ma, S. Ye and Q. Niu, *Polym. Chem.*, 2018, 9, 777–784.
19. D. Gopalakrishnan and W. R. Dichtel, *Chem. Mater.*, 2015, 27, 3813–3816.
20. M. R. Rao, Y. Fang, S. De Feyter and D. F. Perepichka, *J. Am. Chem. Soc.*, 2017, 139, 2421–2427.
21. H. H. Liu and H. Z. Liu, *J. Mater. Chem. A*, 2017, 5, 9156–9162.
22. R. Shen, Y. Liu, W. Yang, Y. Hou, X. Zhao and H. Liu, *Chem. – Eur. J.*, 2017, 23, 13465–13473.
23. Y. Cui, Y. Liu, J. Liu, J. Du, Y. Yu, S. Wang, Z. Liang and J. Yu, *Polym. Chem.*, 2017, 8, 4842–4848.

24. P. Jagadesan, G. Eder and P. L. McGrier, *J. Mater. Chem. C*, 2017, 5, 5676–5679.
25. P. Ju, Q. Su, Z. Liu, X. Li, B. Guo, W. Liu, G. Li and Q. Wu, *J. Mater. Sci.*, 2018, 54, 851–861.
26. J. Li, S. Wang, X. Cao, H. Huang and D. Cao, *Mater. Chem. Front.*, 2021, 5, 3428–3435.
27. Y. He, X. Wang, K. Wang and L. Wang, *Dyes Pigm.*, 2020, 173, 107880.
28. Y. Fu, W. Yu, W. Zhang, Q. Huang, J. Yan, C. Pan and G. Yu, *Polym. Chem.*, 2018, 9, 4125–4131.
29. Y. Zhu, M. Qiao, W. Peng, Y. Li, G. Zhang, F. Zhang, Y. Li and X. Fan, *J. Mater. Chem. A*, 2017, 5, 9272–9278.
30. Q. Dang, H. Wan and X. Zhang, *ACS Appl. Mater. Interfaces*, 2017, 9, 21438–21446.
31. T. Ma, X. Zhao, Y. Matsuo, J. Song, R. Zhao, M. Faheem, M. Chen, Y. Zhang, Y. Tian and G. Zhu, *J. Mater. Chem. C*, 2019, 7, 2327–2332.
32. H. Hong, N. Wu, M. Han, Z. Guo, H. Zhan, S. Du and B. Chen, *Mater. Chem. Front.*, 2021, 5, 6568–6574.
33. E. O' zdemir, D. Thirion and C. T. Yavuz, *RSC Adv.*, 2015, 5, 69010–69015.
34. L. Guo, X. Zeng and D. Cao, *Sens. Actuators, B*, 2016, 226, 273–278.
35. M. Wang, L. Guo and D. Cao, *Sci. China Chem.*, 2017, 60, 1090–1097.
36. B. Guo, Q. Liu, Q. Su, W. Liu, P. Ju, G. Li and Q. Wu, *J. Mater. Sci.*, 2018, 53, 15746–15756.
37. R. Shen, Y. Liu, W. Yang, Y. Hou, X. Zhao and H. Liu, *Chem. – Eur. J.*, 2017, 23, 13465–13473.
38. D. Ma, B. Li, Z. Cui, K. Liu, C. Chen, G. Li, J. Hua, B. Ma, Z. Shi and S. Feng, *ACS Appl. Mater. Interfaces*, 2016, 8, 24097–24103.
39. M. Xu, T. Wang, P. Gao, L. Zhao, L. Zhou and D. Hua, *J. Mater. Chem. A*, 2019, 7, 11214–11222.
40. P. Ju, Q. Su, Z. Liu, X. Li, B. Guo, W. Liu, G. Li and Q. Wu, *J. Mater. Sci.*, 2018, 54, 851–861.
41. O. M. El-Kadri, T. D. Tessema, R. M. Almotawa, R. K. Arvapally, M. H. Al-Sayah, M. A. Omary and H. M. El-Kaderi, *ACS Omega*, 2018, 3, 15510–15518.
42. E. O' zdemir, D. Thirion and C. T. Yavuz, *RSC Adv.*, 2015, 5, 69010–69015.
43. C. Gu, N. Huang, J. Gao, F. Xu, Y. Xu and D. Jiang, *Angew. Chem., Int. Ed.*, 2014, 53, 4850–4855.
44. B. Li, Q. Sun, Y. Zhang, C.W. Abney, B. Aguila, W. Lin and S. Ma. *ACS Appl. Mater. Inter.* 2017, 9, 12511-12517.
45. B. Aguila, Q. Sun, H. Cassidy, C.W. Abney, B.Y. Li and S. Ma. *ACS Appl. Mater. Inter.* 2019, 11, 30919-30926.
46. Z. Li, Q. Meng, Y. Yang, X. Zou, Y. Yuan and G. Zhu. *Chem. Sci.* 2020, 11, 4747-4752.
47. Q. Sun, B. Aguila, J. Perman, A.S. Ivanov, V.S. Bryantsev, L.D. Earl, C.W. Abney, L. Wojtas and S. Ma. *Nat. Commun.* 2018, 9, 1644.
48. X. Li, Y. Zou, Z. Jia, J. Zhang, Y. Li, X. Guo, M. Zhang, K. Li, J. Li and L. Ma. *J. Hazard. Mater.* 2021, 401, 123802.
49. L. Zhang, N. Pu, B.X. Yu, G. Ye, J. Chen, S.M. Xu and S.Q. Ma. *ACS Appl. Mater. Inter.* 2020, 12, 3688-3696.
50. M. Ahmad, J. Chen, K. Yang, T. Shah, M.-u.-d. Naik, Q. Zhang and B. Zhang. *Chem. Eng. J.* 2021, 418, 129370.
51. L. Liang, H. Zhang, X. Lin, K. Yan, M. Li, X. Pan, Y. Hu, Y. Chen, X. Luo and R. Shang. *Colloids Surf. Physicochem. Eng. Aspects* 2021, 625, 126981.
52. H. Li, Y. Li, Y. Zhou, B. Li, D. Liu and H. Liao. *J. Colloid Interface Sci.* 2019, 544, 14-24.
53. Y. Li, L. Wang, B. Li, M. C. Zhang, R. Wen, X. H. Guo, X. Li, J. Zhang, S. J. Li and L. J. Ma. *ACS Appl. Mater. Inter.* 2016, 8, 28853-28861.
54. X. Li, G. Chen and Q. Jia. *Micropor. Mesopor. Mat.* 2019, 279, 186-192.
55. Q. M. Zhang, T. L. Zhai, Z. Wang, G. Cheng, H. Ma, Q. P. Zhang, Y. H. Zhao, B. Tan and C. Zhang. *Adv. Mater. Interfaces*, 2019, 6, 1900249.
56. C. Pei, T. Ben, S. Xu and S. Qiu. *J. Mater. Chem. A* 2014, 2, 7179-7187.



57. Z. Yan, Y. Yuan, Y. Tian, D. Zhang and G. Zhu. *Angew. Chem. Int. Ed.* 2015, 54, 12733-12737.
58. C. Feng, G. Xu, W. Xie, S. Zhang, C. Yao and Y. Xu. *Polymer Chemistry* 2020, 11, 2786-2790.
59. T. Geng, S. Ye, Z. Zhu and W. Zhang. *J. Mater. Chem. A* 2018, 6, 2808-2816.
60. T. Geng, C. Zhang, M. Liu, C. Hu and G. Chen. *J. Mater. Chem. A* 2020, 8, 2820-2826.
61. T. Geng, Z. Zhu, W. Zhang and Y. Wang. *J. Mater. Chem. A* 2017, 5, 7612-7617.
62. T. Geng, G. Chen, L. Ma, C. Zhang, W. Zhang and H. Xu. *Eur. Polym. J.* 2019, 115, 37-44.
63. N. Baig, S. Shetty, S. Al-Mousawi and B. Alameddine. *Polymer Chemistry* 2020, 11, 3066-3074.
64. W. Huan, H. Huiping and P. Qifan. *Colloid. Surface. A* 2021, 627.
65. S. Wang, Y. Liu, Y. Ye, X. Meng, J. Du, X. Song and Z. Liang. *Polymer Chemistry* 2019, 10, 2608-2615.
66. L. Wang, C. Yao, W. Xie, G. Xu, S. Zhang and Y. Xu. *New J. Chem.* 2021, 45, 19636-19640.
67. N. Baig, S. Shetty, S. Al-Mousawi and B. Alameddine. *Polymer Chemistry* 2021, 12, 2282-2292.
68. Y. Huang, M. Ding, J. Ding, J. Kang, Z. Yan, P. Zhao, X. Zhou, Y. Jin, S. Chen, C. Xia. *Chem. Eng. J.* 2022, 435, 134785.
69. J. Li, X. Dai, L. Zhu, C. Xu, D. Zhang, M.A. Silver, P. Li, L. Chen, Y. Li, D. Zuo, H. Zhang, C. Xiao, J. Chen, J. Diwu, O. K. Farha, T. E. Albrecht-Schmitt, Z. Chai and S. Wang, *Nat. Commun.* 2018, 9, 3007.
70. J. Li, L. Chen, N. Shen, R. Xie, M.V. Sheridan, X. Chen, D. Sheng, D. Zhang, Z. Chai and S. Wang. *Sci. China Chem.* 2021, 64, 1251-1260.
71. J. Li, B. Li, N. Shen, L. Chen, Q. Guo, L. Chen, L. He, X. Dai, Z. Chai and S. Wang. *ACS Cent. Sci.* 2021, 7, 1441-1450.
72. Z.W. Liu and B.H. Han, *Environ. Sci. Technol.* 2020, 54, 216-224.
73. Q.-H. Hu, W. Jiang, R.-P. Liang, S. Lin and J.-D. Qiu, *Chem. Eng. J.* 2021, 419, 129546.
74. X. Li, L. Chai, J. Ren, L. Jin, H. Wang, Y. Li and S. Ma. *Polymer Chemistry* 2022, 13, 156-160.
75. X. Li, Y. Li, H. Wang, Z. Niu, Y. He, L. Jin, M. Wu, H. Wang, L. Chai, A.M. Al-Enizi, A. Nafady, S. F. Shaikh and S. Ma, *Small* 2021, 17, e2007994.
76. M. Ding, L. Chen, Y. Xu, B. Chen, J. Ding, R. Wu, C. Huang, Y. He, Y. Jin and C. Xia. *Chem. Eng. J.* 2020, 380, 122581.
77. A. Sen, S. Dutta, G.K. Dam, P. Samanta, S. Let, S. Sharma, M.M. Shirolkar and S. K. Ghosh. *Chem. Eur. J.* 2021, 27, 13442-13449.
78. W. Mandal, S. Fajal, S. Mollick, M. M. Shirolkar, Y. D. More, S. Saurabh, D. Mahato and S. K. Ghosh. *ACS Appl. Mater. Interfaces* 2022, 14, 20042-20052.
79. Q. Sun, L. Zhu, B. Aguila, P.K. Thallapally, C. Xu, J. Chen, S. Wang, D. Rogers and S. Ma. *Nat. Commun.* 2019, 10, 1646.
80. P. Samanta, P. Chandra, S. Dutta, A. V. Desai and S. K. Ghosh, *Chem. Sci.*, 2018, 9, 7874-7881.
81. D. Yuan, W. Lu, D. Zhao, H.-C. Zhou, *Adv. Mater.* 2011, 23, 3723-3725.
82. M. G. Rabbani and H. M. El-Kaderi, *Chem. Mater.* 2012, 24, 1511-1517.
83. P. Arab, M. G. Rabbani, A. K. Sekizkardes, T. Islamoğlu and H. M. El-Kaderi, *Chem. Mater.*, 2014, 26, 1385-1392.
84. P. Arab, E. Parrish, T. Islamoğlu and H. M. El-Kaderi, *J. Mater. Chem. A*, 2015, 3, 20586-20594.
85. Y. Luo, S. Zhang, Y. Ma, W. Wang and B. Tan, *Polym. Chem.*, 2013, 4, 1126-1131.
86. T. Islamoglu, S. Behera, Z. Kahveci, T. D. Tessema, P. Jena and H. M. El-Kaderi, *ACS Appl. Mater. Interfaces*, 2016, 8, 14648-14655.
87. H. Gao, L. Ding, W. Q. Li, G. F. Ma, H. Bai and L. Li, *ACS Macro Lett.*, 2016, 5, 377-381.
88. A. Modak, M. Nandi, J. Mondal and A. Bhaumik, *Chem. Commun.*, 2012, 48, 248-250.
89. T. Jin, Y. Xiong, X. Zhu, Z. Tian, D. J. Tao, J. Hu, D. E. Jiang, H. Wang, H. Liu and S. Dai, *Chem. Commun.*, 2016, 52, 4454-4457.

90. Y. Yuan, P. Cui, Y. Y. Tian, X. Q. Zou, Y. X. Zhou, F. X. Sun and G. S. Zhu, *Chem. Sci.*, 2016, 7, 3751–3756.
91. C. Klumpen, M. Breunig, T. Homburg, N. Stock and J. Senker, *Chem. Mater.*, 2016, 28, 5461–5470.
92. G. Chang, Z. Shang, T. Yu and L. Yang, *J. Mater. Chem. A*, 2016, 4, 2517–2523.
93. S. Dey, A. Bhunia, D. Esquivel and C. Janiak, *J. Mater. Chem. A*, 2016, 4, 6259–6263.
94. K. J. Msayib and N. B. McKeown, *J. Mater. Chem. A*, 2016, 4, 10110–10113.
95. L. Tao, F. Niu, C. Wang, J. Liu, T. Wang and Q. Wang, *J. Mater. Chem. A*, 2016, 4, 11812–11820.
96. S. Zulfiqar, D. Mantione, O. El Tall, M. I. Sarwar, F. Ruipérez, A. Rothenberger and D. Mecerreyes, *J. Mater. Chem. A*, 2016, 4, 8190–8197.
97. Z. Wang, S. Yuan, A. Mason, B. Reprogel, D.-J. Liu and L. Yu, *Macromolecules*, 2012, 45, 7413–7419.
98. S. Mondal and N. Das, *J. Mater. Chem. A*, 2015, 3, 23577–23586.
99. X. Yang, M. Yu, Y. Zhao, C. Zhang, X. Y. Wang and J. X. Jiang, *J. Mater. Chem. A*, 2014, 2, 15139–15145.
100. S. Yao, X. Yang, M. Yu, Y. Zhang and J.-X. Jiang, *J. Mater. Chem. A*, 2014, 2, 8054–8059.
101. A. K. Sekizkardes, T. İslamoğlu, Z. Kahveci and H. M. El-Kaderi, *J. Mater. Chem. A*, 2014, 2, 12492–12500.
102. M. Ding and H. L. Jiang, *Chem. Commun.*, 2016, 52, 12294–12297.
103. X. Zhu, C. Tian, G. M. Veith, C. W. Abney, J. Dehaut and S. Dai, *J. Am. Chem. Soc.*, 2016, 138, 11497–11500.
104. C. Shen, H. Yu and Z. Wang, *Chem. Commun.*, 2014, 50, 11238–11241.
105. H. A. Patel, S. H. Je, J. Park, Y. Jung, A. Coskun and C. T. Yavuz, *Chem.–Eur. J.*, 2014, 20, 772–780.
106. L. Zeng, P. Liao, H. Liu, L. Liu, Z. Liang, J. Zhang, L. Chen and C.-Y. Su, *J. Mater. Chem. A*, 2016, 4, 8328–8336.
107. P. Samanta, P. Chandra, S. K. Ghosh, *Beilstein J. Org. Chem.*, 2016, 12, 1981.
108. J. Roeser, K. Kailasam, A. Thomas, *ChemSusChem*, 2012, 5, 1793–1799.
109. O. Buyukcakir, S.H. Je, S.N. Talapaneni, D. Kim, A. Coskun, *ACS Appl. Mater. Interfaces*, 2017, 9, 7209–7216.
110. D. Kuzmicz, P. Coupillaud, Y.J. Men, J. Vignolle, G. Vendraminetto, M. Ambrogi, D. Taton, J.-Y. Yuan, *Polymer*, 2014, 55, 3423–3430.
111. X.-C. Wang, Y. Zhou, Z.-J. Guo, G.-J. Chen, J. Li, Y.-M. Shi, Y.-Q. Liu, J. Wang, *Chem. Sci.*, 2015, 6, 6916–6924.
112. Z.-J. Guo, X.-C. Cai, J.-Y. Xie, X.-C. Wang, Y. Zhou, J. Wang, *ACS Appl. Mater. Interfaces* 2016, 8, 20, 12812–12821.
113. S. Cai, D.-L. Zhu, Y. Zou, J. Zhao, *Nanoscale Res. Lett.*, 2016, 11, 321.
114. J.-Q. Wang, W.-H. Sng, G.-S. Yi, Y.-G. Zhang, *Chem. Commun.*, 2015, 51, 12076–12079.
115. O. Buyukcakir, S.H. Je, D.S. Choi, S.N. Talapaneni, Y. Seo, Y. Jung, K. Polychronopoulou, A. Coskun, *Chem. Commun.*, 2016, 52, 934–937.
116. W.-L. Wang, C.-Y. Li, L. Yan, Y.-Q. Wang, M. Jiang, Y.-J. Ding, *ACS Catal.* 2016, 6, 9, 6091–6100.
117. T.-T. Liu, J. Liang, Y.-B. Huang, R. Cao, *Chem. Commun.*, 2016, 52, 13288–13291.
118. R.-C. Luo, Y.-J. Chen, Q. He, X.-W. Lin, Q.-H. Xu, X.-H. He, W.-Y. Zhang, X.-T. Zhou, H.-B. Ji, *ChemSusChem*, 2017, 10, 1526–1533.
119. Z.-F. Dai, Q. Sun, X.-L. Liu, C.-Q. Bian, Q.-M. Wu, S.-X. Pan, L. Wang, X.-J. Meng, F. Deng, F.-S. Xiao, *J. Catal.*, 2016, 338, 202–209.

120. Y.-J. Chen, R.-C. Luo, Q.-H. Xu, W.-Y. Zhang, X.-T. Zhou, H.-B. Ji, *ChemCatChem*, 2017, 9, 767–773.
121. Y. Xie, T.-T. Wang, X.-H. Liu, K. Zou, W.-Q. Deng, *Nat. Commun.*, 2103, 4, 1960.
122. J. Chun, S. Kang, N. Kang, S.M. Lee, H.J. Kim, S.U. Son, *J. Mater. Chem. A*, 2013,1, 5517-5523.
123. J. Chen, H. Li, M.-M. Zhong, Q.-H. Yang, *Green Chem.*, 2016,18, 6493-6500.
124. M.-L. Ding, H.-L. Jiang, *Chem. Commun.*, 2016,52, 12294-12297.
125. S.N. Talapaneni, O. Buyukakir, S.H. Je, S. Srinivasan, Y. Seo, K. Polychronopoulou, A. Coskun, *Chem. Mater.* 2015, 27, 19, 6818–6826.
